# Supplementary material for: Spatiotemporal Evolution of SARS-CoV-2 Alpha and Delta Variants during Large Nationwide Outbreak of COVID-19, Vietnam, 2021
Source: PubMed Central journal article supplement (PMC10124647; doi:10.3201/eid2905.221787), 2023-05
Supplement: 22-1787-Techapp-s1.pdf [file 22-1787-Techapp-s1.pdf]

*EID cannot ensure accessibility for Supplemental Materials supplied by authors. Readers who have difficulty accessing supplementary content should contact the authors for assistance.*

# Spatiotemporal Evolution of SARS-CoV-2 Alpha and Delta Variants during Large Nationwide Outbreak of COVID-19, Vietnam, 2021

## Appendix

### Vietnam COVID-19 Containment Approach in 2021

After successfully controlling community transmission during the first 8 months in 2020, Vietnam cautiously reopened its borders, allowing some repatriation flights, while steadily lifting in-country travel restrictions (1). However, following the emergence of new SARS-CoV-2 variants Alpha and Delta variants in late, Vietnam suspended all inbound flights from countries reporting the detection of community transmission associated with these two variants. Additionally, all travelers entering Vietnam were subjected to 14-day isolation, and testing on the day of arrival and on day 14 of quarantine. Yet, after 28 days of no community transmission, on 18th January 2021, two clusters of SARS-CoV-2 infection with epidemiologic links were detected in two neighboring provinces in the north of Vietnam, Hai Duong and Quang Ninh (2). This was followed by the detection of several other community transmission clusters of unclear origin in several provinces across the country in subsequent months before the start of the 2021 major outbreak (Appendix Figure 1). At the national level, the responses were initially targeted e.g., lockdown at community/province/city level where a community transmission cluster was detected. However, in response to the escalation of the outbreak starting in July 2021 (3), Vietnam suspended all arriving international flights in May 2021, and re-applied in-country travel restriction (Appendix Figure 1) until 10th October 2021 when nearly 70% of the eligible population had received at least 1 dose of vaccine (3). In parallel, under the zero COVID-19 policy, Vietnam implemented the meticulous contact tracing and mass testing of the cases and their contacts conducted by provincial Centers for Diseases Control (CDC). This had enabled

accurate identification of cases of community transmission origin alongside the demographic data for analysis (4).

### **Nasopharyngeal Swabs and Sample Selection for Sequencing**

The laboratories of National Hospital for Tropical Diseases (NHTD) in Hanoi, and the Hospital for Tropical Diseases (HTD) in Ho Chi Minh City, Vietnam were responsible for SARS-CoV-2 diagnosis and sequencing in Vietnam. Therefore, nasopharyngeal swab (NPS) samples submitted to NHTD and HTD laboratories for testing and sequencing were either from provincial CDC or from inpatients being treated at these two hospitals.

To increase the chance of successfully obtaining the virus genome, we first applied a preselection criterion based on the cycle threshold (Ct) value of the tested samples generated by the Lightmix Modular SARS-CoV-2 RdRp/E gene assay (Tib Molbiol, Berlin, Germany) (5). This assay could detect both Alpha and Delta variants without compromising the sensitivity (6). Accordingly, at NHTD, only NPS samples with a cycle threshold (Ct) value  $\leq 30$  for the RdRp gene were eligible, while at HTD, a sample with Ct value of  $\leq 25$  for the E gene was included. Additionally, because of the availability of the resources, between January and June 2021 when community transmission remained limited, our approach focused on new community clusters detected through contact tracing under zero-COVID strategy. Between July and December 2021 during which community transmission was escalating, the selection of samples for sequencing was carried out by using WHO recommendations (7). Epidemiologic data, and data on infections and deaths were retrieved from e-hospital record or provided by the National Institute of Hygiene and Epidemiology and the Vietnamese Ministry of Health. Here, we focused our analysis on sequences obtained cases of locally acquired infection, and generated by NHTD or HTD laboratories, of which we had accurate sampling date and demographic data.

Our study formed part of the national COVID-19 response and was approved by the local Institutional Review Board (approval no. 2221/QĐ-BVBNĐ at the Hospital for Tropical Diseases in Ho Chi Minh City and no. 17–2022/HĐĐĐ -NĐTƯ at the National Hospital for Tropical Diseases in Hanoi) and Oxford Tropical Research Ethics Committee (approval no. 557–21). Since only deidentified nasopharyngeal swabs (NPS) were used, the need for individual informed consent was waived.

## **RNA Extraction, Whole-Genome Sequencing, and Sequence Assembly**

Total RNA was extracted from NPS by using QIAamp viral RNA mini kit (Qiagen, Hilden, Germany) following the manufacturer's instructions, and finally eluted in 50µl of elution buffer (provided with the extraction kit). Whole genome amplification was performed on the extracted RNA by using either the long pooled amplicons protocol, developed by the University of Sydney (8,9), or the ARTIC V3 protocol (10) on an Illumina MiSeq platform as previously described. Library preparation was carried out by using the Nextera XT Library preparation kit (Illumina, USA), followed by library quantification by using KAPA Library Quant Kit (Kapa Biosystems, Wilmington, MA, USA), according to the manufacturer's instructions. The prepared library was sequenced by using iSeq reagent kit V2 (300 cycles) on a MiSeq platform (Illumina). For each run, tested samples were multiplexed and differentiated by double indexes by using IDT-ILMN Nextera DNA UD indexes (IDT).

Sequence assembly of the obtained sequencing data was carried out by using a reference-based mapping approach available in CLC genomics workbench (v.21.0.4) and Geneious 8.1.5 (Biomatters, San Francisco, CA, USA). This method involved mapping of sequencing output of individual samples to a reference genome (WuHan-Hu-1: NC\_045512, Alpha: EPI\_ISL\_905782, Delta: EPI\_ISL\_1942165), followed by manual editing of the obtained consensus to ensure the accuracy of the results, as described previously (8). The consensus sequences generated in this study were submitted to the National Center for Biotechnology Information under the assigned accession numbers ON458864-ON459533, ON459545-ON459608, ON755375-ON755859, OQ415286- OQ415315, and OP647358-OP647411, and GISAID with assigned numbers: EPI\_ISL\_10079201-EPI\_ISL\_10079251, EPI\_ISL\_2455221-EPI\_ISL\_2458062, EPI\_ISL\_4503976-EPI\_ISL\_4504960, EPI\_ISL\_4748289-EPI\_ISL\_4748342, EPI\_ISL\_4942690-EPI\_ISL\_4942691, EPI\_ISL\_4969141-EPI\_ISL\_4969175, EPI\_ISL\_5098167-EPI\_ISL\_5098169, EPI\_ISL\_5458630-EPI\_ISL\_5458977, EPI\_ISL\_6773765-EPI\_ISL\_6773813, EPI\_ISL\_7368716-EPI\_ISL\_7368772, EPI\_ISL\_7648835-EPI\_ISL\_7648869, EPI\_ISL\_7650414-EPI\_ISL\_7650455, EPI\_ISL\_5945255- EPI\_ISL\_5945295, EPI\_ISL\_6388348- EPI\_ISL\_6388497, EPI\_ISL\_7195776- EPI\_ISL\_7196062, EPI\_ISL\_7204787- EPI\_ISL\_7204791, EPI\_ISL\_1273214, EPI\_ISL\_16828666 –EPI\_ISL\_16828699, EPI\_ISL\_17016415-EPI\_ISL\_17016441,

EPI\_ISL\_17027400-EPI\_ISL\_17027401, EPI\_ISL\_17016442-EPI\_ISL\_17016449,  
EPI\_ISL\_4503984.

### **Classifications of SARS-CoV-2 Variants**

SARS-CoV-2 variant classification of the obtained consensus was determined by using PANGO lineage (11) with pangolin v4.1.2 and pangolin-data v1.13 (12). The analysis was carried out by using the Ultrafast Sample Placement on Existing Trees option to assign the lineage based on the nearest lineage on existing global tree. Sequence alignment was carried out by using the tool available on Nextclade (13) and Minimap2 (14). Recombination detection was inferred by using a combination of Freyja v 1.3.10 (15) and sc2rf (16).

### **Maximum-Likelihood Framework to Study Genetic Relatedness of Alpha Variant Sequences**

To explore the phylogenetic relationship of Vietnamese Alpha variant sequences obtained as part of the present study, we used a dataset consisting of the complete coding region (29,408 bp) of the obtained sequences and Alpha variant sequences randomly selected from those produced from the region and beyond (The U.S. and the UK) during the study period submitted GISAID. We applied maximum likelihood (ML) method by using the TIM2 nt substitution model with invariant for Alpha variant as suggested by IQ tree (17). Support for individual nodes was assessed by using a bootstrap procedure with 1,000 replicates. To assess the placement of the Vietnamese variants in the context of global sequences, we used the phylogenetic framework incorporated in NextClade by using default setting (13), i.e., taking into account representatives of global sequences submitted to GISAID (Date of accession: 27 October 2022). Phylogenetic clusters were manually inspected by naked eyes.

### **Maximum-Likelihood Phylogenetics, Phylogeography, and Phylodynamics Analysis of Delta Variant Sequences**

In addition to applying PANGO lineage tool to classify the viral lineages of the Delta variant sequences as detailed above, we used maximum likelihood method and NextClade based phylogenetic analysis frameworks to assess the relatedness of the Delta sequences at national and global scale, respectively. For the former, we applied UNREST+F0+R4 as suggested by IQ tree (17). Support for individual nodes was assessed by using a bootstrap procedure with 1,000 replicates. For the latter, we used default setting as outline above.

To study the phylogeographics and phylodynamics of AY.57 lineage, the main lineage detected in Vietnam in 2021, we applied Bayesian phylogenetic inference in BEAST v1.10.4 (18). We first excluded identical sequences and sequences of low quality (e.g., internal gaps). We then used TempEst 1.5 to assess the temporal signal of the dataset (19). Subsequently, we excluded the sequences not conforming to a linear evolutionary pattern as suggested by TempEst. For phylogeographic analysis, we divided Vietnam into eight major geographic regions according to key economic zones (Northeast, Northwest, Red River Delta, North Central Coast, South Central Coast, Highland, Southeast and Mekong Delta) (20). Small sample sizes from individual provinces precluded phylogeographic analyses at a finer spatial scale. We used a Bayesian Markov chain Monte Carlo framework (available in BEAST) with 1 billion steps and sampling every 100,000 steps by using the general time reversible (GTR) nucleotide substitution model with invariant (as suggested by IQ-TREE to be the best-fit model) under an uncorrelated relaxed clock model (21), and a Bayesian skygrid coalescent tree prior (10 groups) (22). We assessed convergence by using Tracer version 1.5 (23). We selected a burn-in threshold of 10% and accepted effective sample size values above 200. Maximum-clade credibility (MCC) tree was then summarized with TreeAnnotator (available in the BEAST package) and visualized in Figtree version 1.4.2 (24).

To assess the effective population size trajectory, we applied Bayesian Skyride model by using the above framework. Finally, we used codon-based method (HyPhy) available in MEGA5 to measure the selection pressure on coding sequences of the pathogen genome, by estimating the ratio of nonsynonymous to synonymous substitution (dN/dS) at gene-wide level (25). The Hyphy used the joint maximum-likelihood reconstructions of ancestral states under a Muse-Gaut model of codon substitution.

## References

1. Van Tan L. COVID-19 control in Vietnam. *Nat Immunol.* 2021;22:261. [PubMed](#)  
<https://doi.org/10.1038/s41590-021-00882-9>
2. Chau NVV, Hong NTT, Ngoc NM, Anh NT, Trieu HT, Nhu LNT, et al.; for OUCRU COVID-19 research group. Rapid whole-genome sequencing to inform COVID-19 outbreak response in Vietnam. *J Infect.* 2021;82:276–316. [PubMed](#) <https://doi.org/10.1016/j.jinf.2021.03.017>

3. WHO. COVID-19 in Viet Nam Situation Report 101, accessed on 24 October 2022. available at <https://www.who.int/vietnam/internal-publications-detail/covid-19-in-viet-nam-situation-report-101>, 2022.
4. Van Vinh Chau N, Lam VT, Dung NT, Yen LM, Minh NNQ, Hung LM, et al.; Oxford University Clinical Research Unit COVID-19 Research Group. The Natural History and Transmission Potential of Asymptomatic Severe Acute Respiratory Syndrome Coronavirus 2 Infection. *Clin Infect Dis*. 2020;71:2679–87. [PubMed <https://doi.org/10.1093/cid/ciaa711>](https://doi.org/10.1093/cid/ciaa711)
5. Corman VM, Landt O, Kaiser M, Molenkamp R, Meijer A, Chu DK, et al. Detection of 2019 novel coronavirus (2019-nCoV) by real-time RT-PCR. *Euro Surveill*. 2020;25:2000045. [PubMed <https://doi.org/10.2807/1560-7917.ES.2020.25.3.2000045>](https://doi.org/10.2807/1560-7917.ES.2020.25.3.2000045)
6. Mögling R, Fischer C, Stanoeva KR, Melidou A, Almeida Campos AC, Drosten C, et al. Sensitivity of Detection and Variant Typing of SARS-CoV-2 in European Laboratories. *J Clin Microbiol*. 2022;60:e0126122. [PubMed <https://doi.org/10.1128/jcm.01261-22>](https://doi.org/10.1128/jcm.01261-22)
7. Organization WH. Operational considerations to expedite genomic sequencing component of GISRS surveillance of SARS-CoV-2. WHO. 1–10. 2021.
8. Nguyen TT, Pham TN, Van TD, Nguyen TT, Nguyen DTN, Le HNM, et al.; OUCRU COVID-19 Research Group. Genetic diversity of SARS-CoV-2 and clinical, epidemiological characteristics of COVID-19 patients in Hanoi, Vietnam. *PLoS One*. 2020;15:e0242537. [PubMed <https://doi.org/10.1371/journal.pone.0242537>](https://doi.org/10.1371/journal.pone.0242537)
9. Eden J-S, Sim E. SARS-CoV-2 Genome Sequencing Using Long Pooled Amplicons on Illumina Platforms. Available on <https://www.protocols.io/view/sars-cov-2-genome-sequencing-using-long-pooled-amp-kxygxeob4v8j/v1>. 2020.
10. Quick, J., nCoV-2019 sequencing protocol V.3. 2020.
11. Rambaut A, Holmes EC, O’Toole Á, Hill V, McCrone JT, Ruis C, et al. A dynamic nomenclature proposal for SARS-CoV-2 lineages to assist genomic epidemiology. *Nat Microbiol*. 2020;5:1403–7. [PubMed <https://doi.org/10.1038/s41564-020-0770-5>](https://doi.org/10.1038/s41564-020-0770-5)
12. <https://github.com/cov-lineages/pangolin>.
13. Aksamentov I, Roemer C, Hodcroft E, Neher R. Nextclade: clade assignment, mutation calling and quality control for viral genomes. *J Open Source Softw*. 2021;6:3773. <https://doi.org/10.21105/joss.03773>

14. Li H. Minimap2: pairwise alignment for nucleotide sequences. *Bioinformatics*. 2018;34:3094–100. [PubMed https://doi.org/10.1093/bioinformatics/bty191](https://doi.org/10.1093/bioinformatics/bty191)
15. Freyja v 1.3.10, available at <https://github.com/andersen-lab/Freyja>.
16. Sc2rf - SARS-Cov-2 Recombinant Finder, available at <https://github.com/lenaschimmel/sc2rf>.
17. Nguyen LT, Schmidt HA, von Haeseler A, Minh BQ. IQ-TREE: a fast and effective stochastic algorithm for estimating maximum-likelihood phylogenies. *Mol Biol Evol*. 2015;32:268–74. [PubMed https://doi.org/10.1093/molbev/msu300](https://doi.org/10.1093/molbev/msu300)
18. Suchard MA, Lemey P, Baele G, Ayres DL, Drummond AJ, Rambaut A. Bayesian phylogenetic and phylodynamic data integration using BEAST 1.10. *Virus Evol*. 2018;4:vey016. [PubMed https://doi.org/10.1093/ve/vey016](https://doi.org/10.1093/ve/vey016)
19. Rambaut A, Lam TT, Max Carvalho L, Pybus OG. Exploring the temporal structure of heterochronous sequences using TempEst (formerly Path-O-Gen). *Virus Evol*. 2016;2:vew007. [PubMed https://doi.org/10.1093/ve/vew007](https://doi.org/10.1093/ve/vew007)
20. <https://www.vietnam-briefing.com/news/vietnams-regions-key-economic-zones.html/> Access date: 3rd March 2023.
21. Drummond AJ, Ho SY, Phillips MJ, Rambaut A. Relaxed phylogenetics and dating with confidence. *PLoS Biol*. 2006;4:e88. [PubMed https://doi.org/10.1371/journal.pbio.0040088](https://doi.org/10.1371/journal.pbio.0040088)
22. Minin VN, Bloomquist EW, Suchard MA. Smooth skyride through a rough skyline: Bayesian coalescent-based inference of population dynamics. *Mol Biol Evol*. 2008;25:1459–71. [PubMed https://doi.org/10.1093/molbev/msn090](https://doi.org/10.1093/molbev/msn090)
23. Available at <http://tree.bio.ed.ac.uk/software/tracer/>.
24. Figtree version 1.4.2, available at (<http://tree.bio.ed.ac.uk/software/figtree/>).
25. Tamura K, Peterson D, Peterson N, Stecher G, Nei M, Kumar S. MEGA5: molecular evolutionary genetics analysis using maximum-likelihood, evolutionary distance, and maximum parsimony methods. *Mol Biol Evol*. 2011;28:2731–9. [PubMed https://doi.org/10.1093/molbev/msr121](https://doi.org/10.1093/molbev/msr121)

**Appendix Table 1.** Breakdown dN/dS ratios for specific coding regions

| Gene  | CDS  | ORF1a | ORF1b | S    | ORF3a | E    | M    | ORF6 | ORF7a | ORF7b | ORF8 | N    |
|-------|------|-------|-------|------|-------|------|------|------|-------|-------|------|------|
| dN/dS | 0.86 | 0.69  | 1.45  | 0.59 | 1.44  | 1.14 | 0.27 | 0.86 | 1.3   | 0.82  | 0.37 | 0.53 |

**Appendix Table 2.** GISAID numbers and geographic locations of sequences used for analysis in the present study

| GISAID number    | Location |
|------------------|----------|
| EPI_ISL_2405168  | China    |
| EPI_ISL_2405175  | China    |
| EPI_ISL_16405160 | China    |
| EPI_ISL_9910213  | China    |
| EPI_ISL_9910219  | China    |
| EPI_ISL_1121993  | China    |
| EPI_ISL_9910211  | China    |
| EPI_ISL_2432955  | China    |
| EPI_ISL_2432957  | China    |
| EPI_ISL_11799982 | China    |
| EPI_ISL_2432956  | China    |
| EPI_ISL_2405171  | China    |
| EPI_ISL_1098602  | Cambodia |
| EPI_ISL_1098604  | Cambodia |
| EPI_ISL_1098606  | Cambodia |
| EPI_ISL_1098608  | Cambodia |
| EPI_ISL_1532810  | Cambodia |
| EPI_ISL_1532811  | Cambodia |
| EPI_ISL_1532815  | Cambodia |
| EPI_ISL_1534538  | Cambodia |
| EPI_ISL_1534543  | Cambodia |
| EPI_ISL_1711976  | Cambodia |
| EPI_ISL_1711977  | Cambodia |
| EPI_ISL_1711983  | Cambodia |
| EPI_ISL_1711997  | Cambodia |
| EPI_ISL_1818952  | Cambodia |
| EPI_ISL_1818965  | Cambodia |
| EPI_ISL_1969674  | Cambodia |
| EPI_ISL_1969689  | Cambodia |
| EPI_ISL_2106235  | Cambodia |
| EPI_ISL_2106238  | Cambodia |
| EPI_ISL_2106241  | Cambodia |
| EPI_ISL_2106249  | Cambodia |
| EPI_ISL_2106272  | Cambodia |
| EPI_ISL_2106275  | Cambodia |
| EPI_ISL_2106280  | Cambodia |
| EPI_ISL_2106282  | Cambodia |
| EPI_ISL_2231565  | Cambodia |
| EPI_ISL_2231569  | Cambodia |
| EPI_ISL_2231572  | Cambodia |
| EPI_ISL_2231574  | Cambodia |
| EPI_ISL_2231576  | Cambodia |
| EPI_ISL_2231583  | Cambodia |
| EPI_ISL_2231585  | Cambodia |
| EPI_ISL_2231588  | Cambodia |
| EPI_ISL_2343208  | Cambodia |
| EPI_ISL_2343220  | Cambodia |
| EPI_ISL_2343225  | Cambodia |
| EPI_ISL_2343230  | Cambodia |
| EPI_ISL_2343236  | Cambodia |
| EPI_ISL_2343241  | Cambodia |
| EPI_ISL_2343242  | Cambodia |



| <b>GISAID number</b> | <b>Location</b> |
|----------------------|-----------------|
| EPI_ISL_2343249      | Cambodia        |
| EPI_ISL_2343251      | Cambodia        |
| EPI_ISL_2406462      | Cambodia        |
| EPI_ISL_2406465      | Cambodia        |
| EPI_ISL_2406469      | Cambodia        |
| EPI_ISL_2406479      | Cambodia        |
| EPI_ISL_2547286      | Cambodia        |
| EPI_ISL_4489759      | Cambodia        |
| EPI_ISL_4503196      | Cambodia        |
| EPI_ISL_1118931      | Indonesia       |
| EPI_ISL_1169048      | Indonesia       |
| EPI_ISL_1169049      | Indonesia       |
| EPI_ISL_1415427      | Indonesia       |
| EPI_ISL_1415898      | Indonesia       |
| EPI_ISL_1416191      | Indonesia       |
| EPI_ISL_1824606      | Indonesia       |
| EPI_ISL_2233088      | Indonesia       |
| EPI_ISL_2258213      | Indonesia       |
| EPI_ISL_2262257      | Indonesia       |
| EPI_ISL_2262261      | Indonesia       |
| EPI_ISL_2382408      | Indonesia       |
| EPI_ISL_2500465      | Indonesia       |
| EPI_ISL_2500467      | Indonesia       |
| EPI_ISL_2500468      | Indonesia       |
| EPI_ISL_2617521      | Indonesia       |
| EPI_ISL_2617531      | Indonesia       |
| EPI_ISL_2617533      | Indonesia       |
| EPI_ISL_2631491      | Indonesia       |
| EPI_ISL_2854698      | Indonesia       |
| EPI_ISL_2854714      | Indonesia       |
| EPI_ISL_2931788      | Indonesia       |
| EPI_ISL_2987647      | Indonesia       |
| EPI_ISL_3070877      | Indonesia       |
| EPI_ISL_3070893      | Indonesia       |
| EPI_ISL_3070899      | Indonesia       |
| EPI_ISL_3278297      | Indonesia       |
| EPI_ISL_5328539      | Indonesia       |
| EPI_ISL_7550108      | Indonesia       |
| EPI_ISL_1787318      | Malaysia        |
| EPI_ISL_1787319      | Malaysia        |
| EPI_ISL_2342546      | Malaysia        |
| EPI_ISL_3246353      | Malaysia        |
| EPI_ISL_3246393      | Malaysia        |
| EPI_ISL_3246395      | Malaysia        |
| EPI_ISL_3246401      | Malaysia        |
| EPI_ISL_3356277      | Malaysia        |
| EPI_ISL_3356278      | Malaysia        |
| EPI_ISL_934424       | Malaysia        |
| EPI_ISL_2592630      | Myanmar         |
| EPI_ISL_2595725      | Myanmar         |
| EPI_ISL_953385       | Singapore       |
| EPI_ISL_1524793      | Singapore       |
| EPI_ISL_1543968      | Singapore       |
| EPI_ISL_1524785      | Singapore       |
| EPI_ISL_1652099      | Singapore       |
| EPI_ISL_1620138      | Singapore       |
| EPI_ISL_1524779      | Singapore       |
| EPI_ISL_1524778      | Singapore       |
| EPI_ISL_1367549      | Singapore       |
| EPI_ISL_1489719      | Singapore       |
| EPI_ISL_1543965      | Singapore       |
| EPI_ISL_1173251      | Singapore       |
| EPI_ISL_825082       | Singapore       |
| EPI_ISL_1897641      | Singapore       |
| EPI_ISL_1719883      | Singapore       |

| <b>GISAID number</b> | <b>Location</b> |
|----------------------|-----------------|
| EPI_ISL_833375       | Singapore       |
| EPI_ISL_1652101      | Singapore       |
| EPI_ISL_1098836      | Singapore       |
| EPI_ISL_857471       | Singapore       |
| EPI_ISL_1524782      | Singapore       |
| EPI_ISL_1312383      | Singapore       |
| EPI_ISL_857470       | Singapore       |
| EPI_ISL_2349770      | Singapore       |
| EPI_ISL_1098835      | Singapore       |
| EPI_ISL_1719879      | Singapore       |
| EPI_ISL_981009       | Singapore       |
| EPI_ISL_1524777      | Singapore       |
| EPI_ISL_803963       | Singapore       |
| EPI_ISL_1719878      | Singapore       |
| EPI_ISL_1519405      | Singapore       |
| EPI_ISL_1489722      | Singapore       |
| EPI_ISL_1543964      | Singapore       |
| EPI_ISL_1524781      | Singapore       |
| EPI_ISL_1719881      | Singapore       |
| EPI_ISL_1816928      | Singapore       |
| EPI_ISL_1704825      | Singapore       |
| EPI_ISL_1652102      | Singapore       |
| EPI_ISL_1315627      | Singapore       |
| EPI_ISL_995295       | Singapore       |
| EPI_ISL_1081939      | Singapore       |
| EPI_ISL_1652097      | Singapore       |
| EPI_ISL_1719880      | Singapore       |
| EPI_ISL_1519398      | Singapore       |
| EPI_ISL_1524784      | Singapore       |
| EPI_ISL_981012       | Singapore       |
| EPI_ISL_1816930      | Singapore       |
| EPI_ISL_1652098      | Singapore       |
| EPI_ISL_1312382      | Singapore       |
| EPI_ISL_2349794      | Singapore       |
| EPI_ISL_1367555      | Singapore       |
| EPI_ISL_1568432      | Singapore       |
| EPI_ISL_1620134      | Singapore       |
| EPI_ISL_1543966      | Singapore       |
| EPI_ISL_2349771      | Singapore       |
| EPI_ISL_1897640      | Singapore       |
| EPI_ISL_1367558      | Singapore       |
| EPI_ISL_1897638      | Singapore       |
| EPI_ISL_1749430      | Singapore       |
| EPI_ISL_1524783      | Singapore       |
| EPI_ISL_1543970      | Singapore       |
| EPI_ISL_1749431      | Singapore       |
| EPI_ISL_1489726      | Singapore       |
| EPI_ISL_1620140      | Singapore       |
| EPI_ISL_1620139      | Singapore       |
| EPI_ISL_1524795      | Singapore       |
| EPI_ISL_1295938      | Singapore       |
| EPI_ISL_2349832      | Singapore       |
| EPI_ISL_2508722      | Singapore       |
| EPI_ISL_2508714      | Singapore       |
| EPI_ISL_953387       | Singapore       |
| EPI_ISL_1620135      | Singapore       |
| EPI_ISL_1489723      | Singapore       |
| EPI_ISL_4115388      | Japan           |
| EPI_ISL_4115394      | Japan           |
| EPI_ISL_4115327      | Japan           |
| EPI_ISL_4115385      | Japan           |
| EPI_ISL_2335681      | Japan           |
| EPI_ISL_4115342      | Japan           |
| EPI_ISL_4115345      | Japan           |
| EPI_ISL_4115348      | Japan           |

| <b>GISAID number</b> | <b>Location</b> |
|----------------------|-----------------|
| EPI_ISL_10993951     | Japan           |
| EPI_ISL_10993952     | Japan           |
| EPI_ISL_10993953     | Japan           |
| EPI_ISL_10993954     | Japan           |
| EPI_ISL_10993955     | Japan           |
| EPI_ISL_10993957     | Japan           |
| EPI_ISL_825387       | Japan           |
| EPI_ISL_825391       | Japan           |
| EPI_ISL_825392       | Japan           |
| EPI_ISL_1931071      | Japan           |
| EPI_ISL_1929159      | Japan           |
| EPI_ISL_1929390      | Japan           |
| EPI_ISL_1927819      | Japan           |
| EPI_ISL_1931135      | Japan           |
| EPI_ISL_1927824      | Japan           |
| EPI_ISL_3196853      | Japan           |
| EPI_ISL_1929315      | Japan           |
| EPI_ISL_11823586     | Japan           |
| EPI_ISL_3196812      | Japan           |
| EPI_ISL_1941905      | Japan           |
| EPI_ISL_1929186      | Japan           |
| EPI_ISL_1927816      | Japan           |
| EPI_ISL_1927037      | Japan           |
| EPI_ISL_2328029      | Japan           |
| EPI_ISL_1933713      | Japan           |
| EPI_ISL_1932608      | Japan           |
| EPI_ISL_1927180      | Japan           |
| EPI_ISL_3196934      | Japan           |
| EPI_ISL_3827196      | Thailand        |
| EPI_ISL_2433378      | Thailand        |
| EPI_ISL_3827383      | Thailand        |
| EPI_ISL_2433352      | Thailand        |
| EPI_ISL_2433456      | Thailand        |
| EPI_ISL_2433401      | Thailand        |
| EPI_ISL_984304       | Thailand        |
| EPI_ISL_5030241      | Thailand        |
| EPI_ISL_2350995      | Thailand        |
| EPI_ISL_2350939      | Thailand        |
| EPI_ISL_2433387      | Thailand        |
| EPI_ISL_2433362      | Thailand        |
| EPI_ISL_4255541      | Thailand        |
| EPI_ISL_2433447      | Thailand        |
| EPI_ISL_2351073      | Thailand        |
| EPI_ISL_3826630      | Thailand        |
| EPI_ISL_2350954      | Thailand        |
| EPI_ISL_2351100      | Thailand        |
| EPI_ISL_3826563      | Thailand        |
| EPI_ISL_3827396      | Thailand        |
| EPI_ISL_2351155      | Thailand        |
| EPI_ISL_4255170      | Thailand        |
| EPI_ISL_2351062      | Thailand        |
| EPI_ISL_2351101      | Thailand        |
| EPI_ISL_2351036      | Thailand        |
| EPI_ISL_2350956      | Thailand        |
| EPI_ISL_3827237      | Thailand        |
| EPI_ISL_3827251      | Thailand        |
| EPI_ISL_3827244      | Thailand        |
| EPI_ISL_2351152      | Thailand        |
| EPI_ISL_2433548      | Thailand        |
| EPI_ISL_3826668      | Thailand        |
| EPI_ISL_2350928      | Thailand        |
| EPI_ISL_3826650      | Thailand        |
| EPI_ISL_3826648      | Thailand        |
| EPI_ISL_3826620      | Thailand        |
| EPI_ISL_3826641      | Thailand        |

| <b>GISAID number</b> | <b>Location</b> |
|----------------------|-----------------|
| EPI_ISL_2433461      | Thailand        |
| EPI_ISL_3892115      | Thailand        |
| EPI_ISL_2351065      | Thailand        |
| EPI_ISL_3826704      | Thailand        |
| EPI_ISL_3826720      | Thailand        |
| EPI_ISL_3827380      | Thailand        |
| EPI_ISL_3827207      | Thailand        |
| EPI_ISL_3827347      | Thailand        |
| EPI_ISL_3826524      | Thailand        |
| EPI_ISL_2678115      | Thailand        |
| EPI_ISL_3827373      | Thailand        |
| EPI_ISL_3826579      | Thailand        |
| EPI_ISL_2350960      | Thailand        |
| EPI_ISL_2351177      | Thailand        |
| EPI_ISL_877766       | Thailand        |
| EPI_ISL_3826661      | Thailand        |
| EPI_ISL_3892089      | Thailand        |
| EPI_ISL_3827254      | Thailand        |
| EPI_ISL_3826531      | Thailand        |
| EPI_ISL_2433539      | Thailand        |
| EPI_ISL_2351160      | Thailand        |
| EPI_ISL_3826664      | Thailand        |
| EPI_ISL_2433532      | Thailand        |
| EPI_ISL_2433465      | Thailand        |
| EPI_ISL_3826721      | Thailand        |
| EPI_ISL_2351047      | Thailand        |
| EPI_ISL_2433503      | Thailand        |
| EPI_ISL_3827178      | Thailand        |
| EPI_ISL_1205541      | England         |
| EPI_ISL_1205533      | England         |
| EPI_ISL_1205524      | England         |
| EPI_ISL_1205518      | England         |
| EPI_ISL_1205562      | England         |
| EPI_ISL_1205566      | England         |
| EPI_ISL_1205517      | England         |
| EPI_ISL_2739810      | England         |
| EPI_ISL_2739841      | England         |
| EPI_ISL_2740023      | England         |
| EPI_ISL_2739779      | England         |
| EPI_ISL_2739793      | England         |
| EPI_ISL_2739796      | England         |
| EPI_ISL_2753420      | England         |
| EPI_ISL_1638023      | England         |
| EPI_ISL_5566664      | Philippines     |
| EPI_ISL_5567559      | Philippines     |
| EPI_ISL_2188177      | Philippines     |
| EPI_ISL_2859726      | Philippines     |
| EPI_ISL_4741371      | Philippines     |
| EPI_ISL_2188745      | Philippines     |
| EPI_ISL_2188045      | Philippines     |
| EPI_ISL_2859714      | Philippines     |
| EPI_ISL_2859778      | Philippines     |
| EPI_ISL_5567366      | Philippines     |
| EPI_ISL_5566756      | Philippines     |
| EPI_ISL_2859720      | Philippines     |
| EPI_ISL_2155994      | Philippines     |
| EPI_ISL_2188916      | Philippines     |
| EPI_ISL_2156243      | Philippines     |
| EPI_ISL_2859269      | Philippines     |
| EPI_ISL_5567999      | Philippines     |
| EPI_ISL_4741345      | Philippines     |
| EPI_ISL_5566428      | Philippines     |
| EPI_ISL_5566378      | Philippines     |
| EPI_ISL_5568163      | Philippines     |
| EPI_ISL_5568544      | Philippines     |

| <b>GISAID number</b> | <b>Location</b> |
|----------------------|-----------------|
| EPI_ISL_2859679      | Philippines     |
| EPI_ISL_4712193      | Philippines     |
| EPI_ISL_5566890      | Philippines     |
| EPI_ISL_2860194      | Philippines     |
| EPI_ISL_5934900      | Philippines     |
| EPI_ISL_4712464      | Philippines     |
| EPI_ISL_5568013      | Philippines     |
| EPI_ISL_5561549      | Philippines     |
| EPI_ISL_2189162      | Philippines     |
| EPI_ISL_4459456      | Philippines     |
| EPI_ISL_4347131      | United States   |
| EPI_ISL_4347672      | United States   |
| EPI_ISL_4347113      | United States   |
| EPI_ISL_4347286      | United States   |
| EPI_ISL_4347568      | United States   |
| EPI_ISL_4347140      | United States   |
| EPI_ISL_4347237      | United States   |
| EPI_ISL_4347529      | United States   |
| EPI_ISL_4347059      | United States   |
| EPI_ISL_4347152      | United States   |
| EPI_ISL_4347070      | United States   |
| EPI_ISL_4347309      | United States   |
| EPI_ISL_4347048      | United States   |
| EPI_ISL_4347456      | United States   |
| EPI_ISL_4347366      | United States   |
| EPI_ISL_4347315      | United States   |
| EPI_ISL_4347145      | United States   |
| EPI_ISL_4347143      | United States   |
| EPI_ISL_4347259      | United States   |
| EPI_ISL_4347543      | United States   |
| EPI_ISL_4347360      | United States   |
| EPI_ISL_4347359      | United States   |
| EPI_ISL_4347696      | United States   |
| EPI_ISL_4347032      | United States   |
| EPI_ISL_4347604      | United States   |
| EPI_ISL_4347531      | United States   |
| EPI_ISL_4347495      | United States   |
| EPI_ISL_4347094      | United States   |
| EPI_ISL_4347686      | United States   |
| EPI_ISL_4347580      | United States   |
| EPI_ISL_4347448      | United States   |
| EPI_ISL_4347213      | United States   |
| EPI_ISL_4347003      | United States   |
| EPI_ISL_4347076      | United States   |
| EPI_ISL_4347093      | United States   |
| EPI_ISL_4347717      | United States   |
| EPI_ISL_4347412      | United States   |
| EPI_ISL_4347024      | United States   |
| EPI_ISL_4347169      | United States   |
| EPI_ISL_4347648      | United States   |
| EPI_ISL_4347373      | United States   |
| EPI_ISL_4347379      | United States   |
| EPI_ISL_4347633      | United States   |
| EPI_ISL_4347147      | United States   |
| EPI_ISL_4347216      | United States   |
| United States        | United States   |
| EPI_ISL_4347046      | United States   |
| EPI_ISL_4347316      | United States   |
| EPI_ISL_4347010      | United States   |
| EPI_ISL_4347036      | United States   |
| EPI_ISL_4347674      | United States   |
| EPI_ISL_4347303      | United States   |
| EPI_ISL_4347603      | United States   |
| EPI_ISL_4347385      | United States   |
| EPI_ISL_4347424      | United States   |

| <b>GISAID number</b> | <b>Location</b> |
|----------------------|-----------------|
| EPI_ISL_4347540      | United States   |
| EPI_ISL_4347219      | United States   |
| EPI_ISL_4347150      | United States   |
| EPI_ISL_4347535      | United States   |
| EPI_ISL_4347618      | United States   |
| EPI_ISL_4347009      | United States   |
| EPI_ISL_4347320      | United States   |
| EPI_ISL_4347698      | United States   |
| EPI_ISL_4347720      | United States   |
| EPI_ISL_4347342      | United States   |
| EPI_ISL_4347409      | United States   |
| EPI_ISL_4347054      | United States   |
| EPI_ISL_4347533      | United States   |
| EPI_ISL_4347467      | United States   |
| EPI_ISL_4347683      | United States   |
| EPI_ISL_4347042      | United States   |
| EPI_ISL_4347560      | United States   |
| EPI_ISL_4347498      | United States   |
| EPI_ISL_4347020      | United States   |
| EPI_ISL_4347158      | United States   |
| EPI_ISL_4347189      | United States   |
| EPI_ISL_4347487      | United States   |
| EPI_ISL_4347575      | United States   |
| EPI_ISL_4347361      | United States   |
| EPI_ISL_4347031      | United States   |
| EPI_ISL_4347423      | United States   |
| EPI_ISL_4347428      | United States   |
| EPI_ISL_4347116      | United States   |
| EPI_ISL_4347501      | United States   |
| EPI_ISL_4347168      | United States   |
| EPI_ISL_4347205      | United States   |
| EPI_ISL_4347545      | United States   |
| EPI_ISL_4347202      | United States   |
| EPI_ISL_4347253      | United States   |
| EPI_ISL_4347630      | United States   |
| EPI_ISL_4347561      | United States   |
| EPI_ISL_4347386      | United States   |
| EPI_ISL_4347453      | United States   |
| EPI_ISL_4347635      | United States   |
| EPI_ISL_4347333      | United States   |
| EPI_ISL_4347466      | United States   |
| EPI_ISL_4347268      | United States   |
| EPI_ISL_4347124      | United States   |
| EPI_ISL_4347589      | United States   |
| EPI_ISL_4347159      | United States   |
| EPI_ISL_4347430      | United States   |
| EPI_ISL_4347214      | United States   |
| EPI_ISL_4347395      | United States   |
| EPI_ISL_4347459      | United States   |
| EPI_ISL_4347328      | United States   |

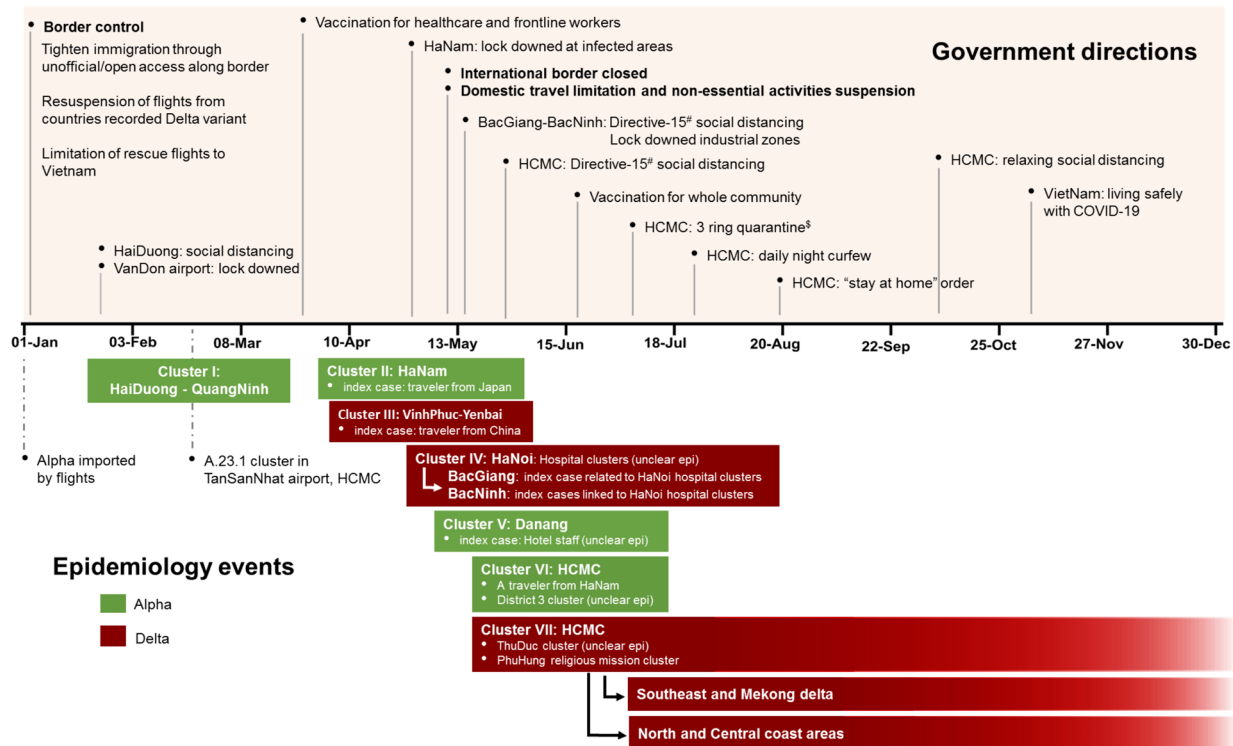

**Appendix Figure 1.** Government directions and COVID-19 epidemiology events in Vietnam in 2021.

<sup>#</sup>Directive-15: Suspension of non-essential services/businesses and mass gatherings, applying physical distance of 2 m when contact with others, banning the gatherings of 20 persons or more in one place and 10 persons or more outside workplaces and limitation of movements. <sup>\$</sup>3 ring quarantine: apply Directive-16 whole city (bans gatherings of two more persons in public and asks persons to only leave homes for emergencies, food, medicine, work in factories, and businesses that involve essential goods and services), lockdown at residential areas with covid-19 case report, home quarantine for F1. HCMC: Ho Chi Minh city.

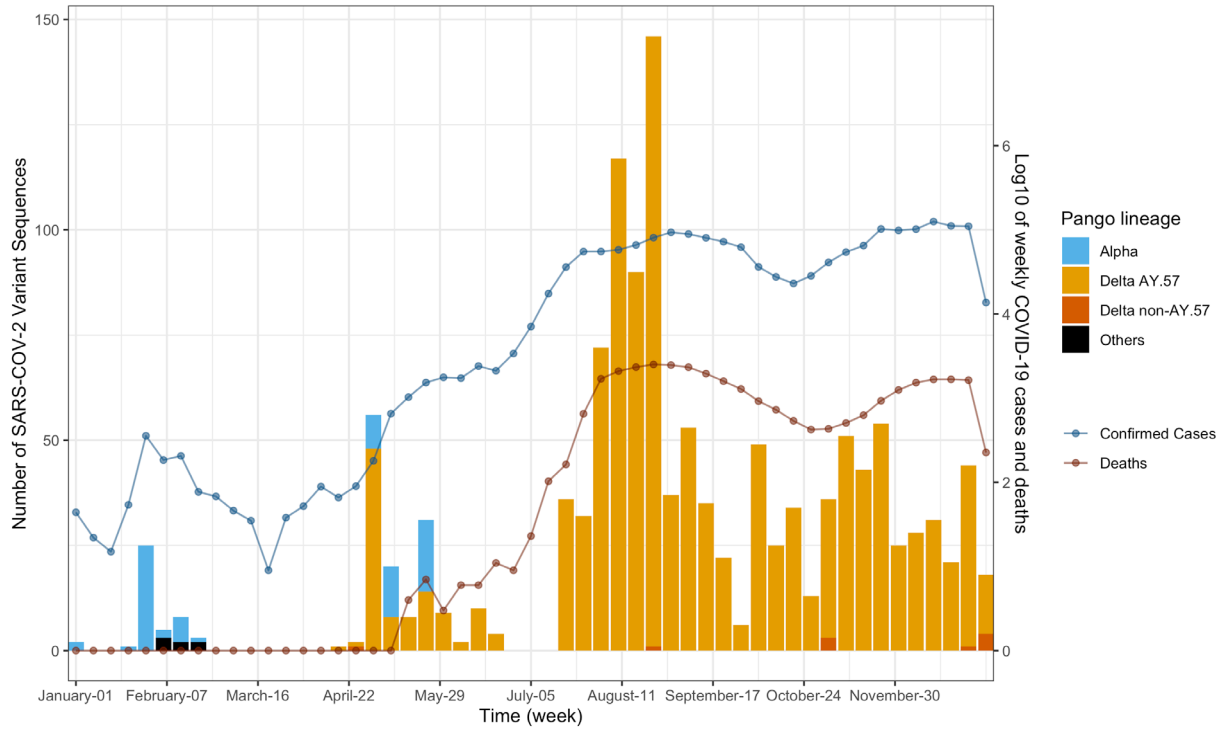

**Appendix Figure 2.** Line chart showing the number of reported COVID-19 cases and deaths during the 2021 outbreak of COVID-10 in Vietnam alongside the monthly number of SARS-CoV-2 variants (bar chart) detected among cases of community transmission between January and December 2021. Delta variant non-AY.57 lineage includes B.1.617.2 (n = 1), AY.23 (n = 3), AY.79 (n = 3), AY.85 (n = 1), AY.6 (n = 1), and AY.38 (n = 1). Others include lineages B.1.637 (n = 2) and A.23.1 (n = 5).



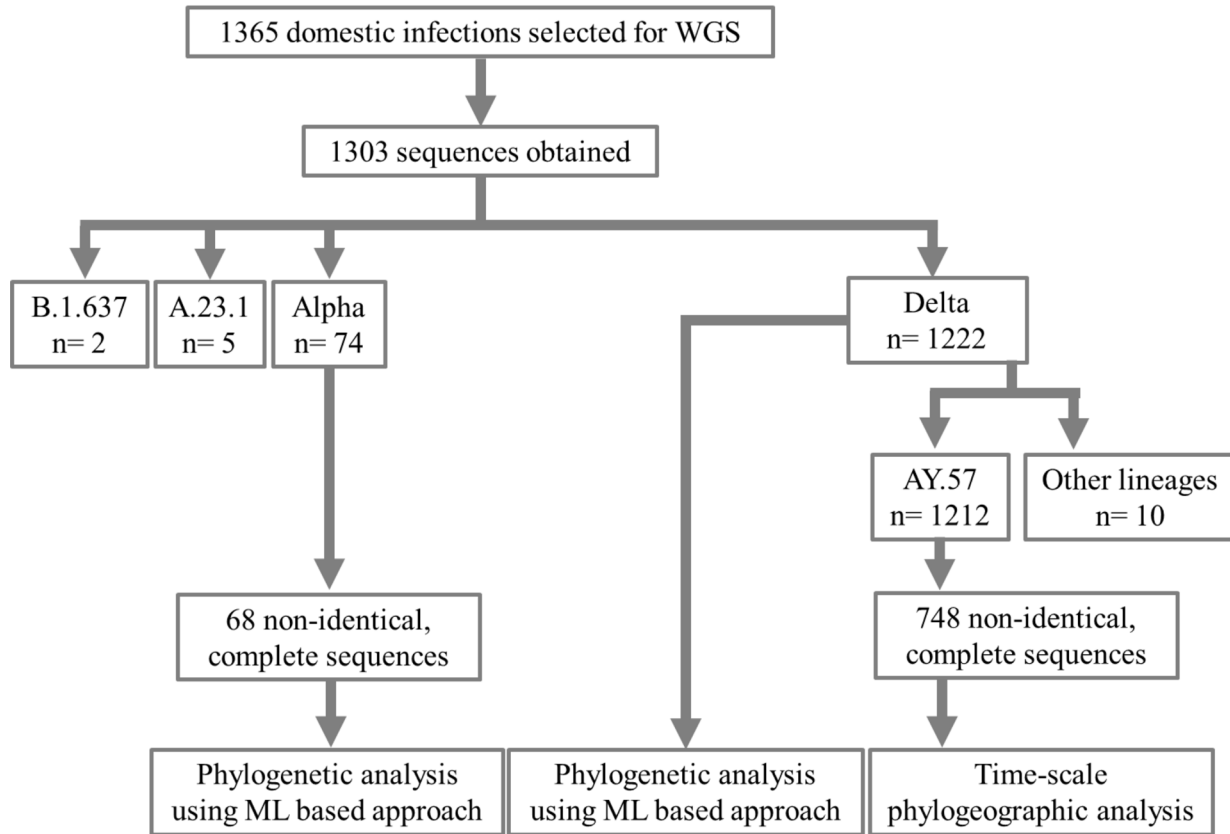

**Appendix Figure 3.** Workflow of the study.

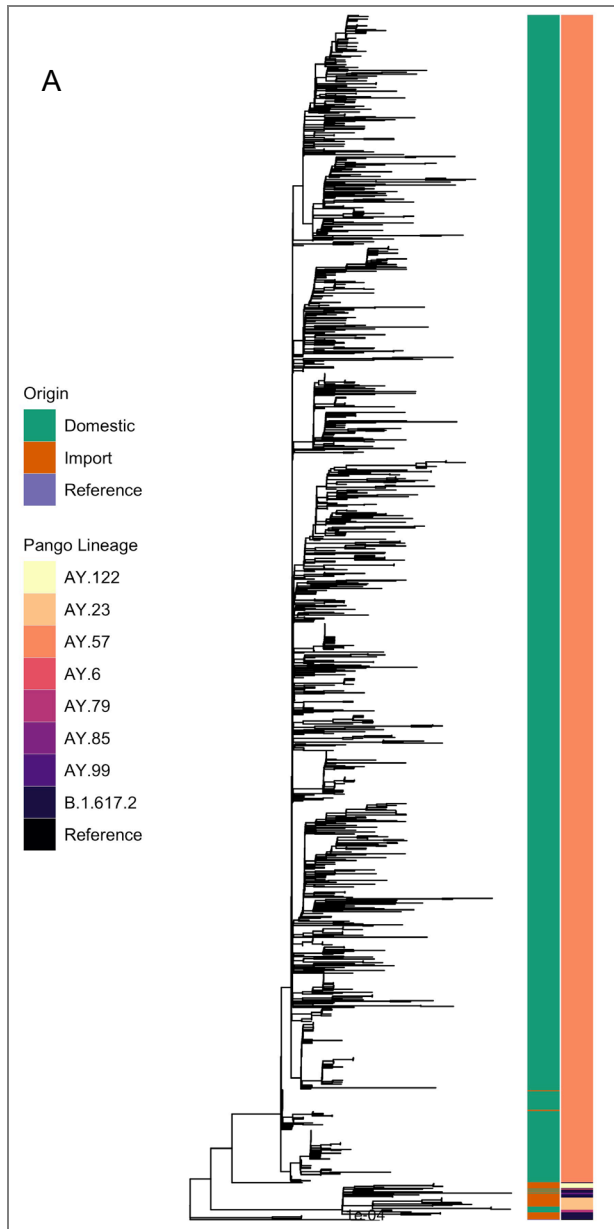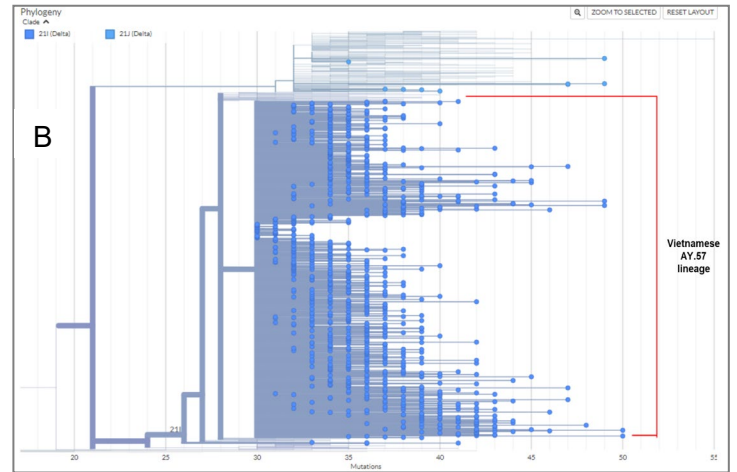

**Appendix Figure 4. A)** Reconstructed ML tree depicting the relationship between Delta variants detected in Vietnam, and **B)** NexClade Based phylogenetic analysis illustrating the placement of the Vietnamese sequences among global sequences submitted GISAID.

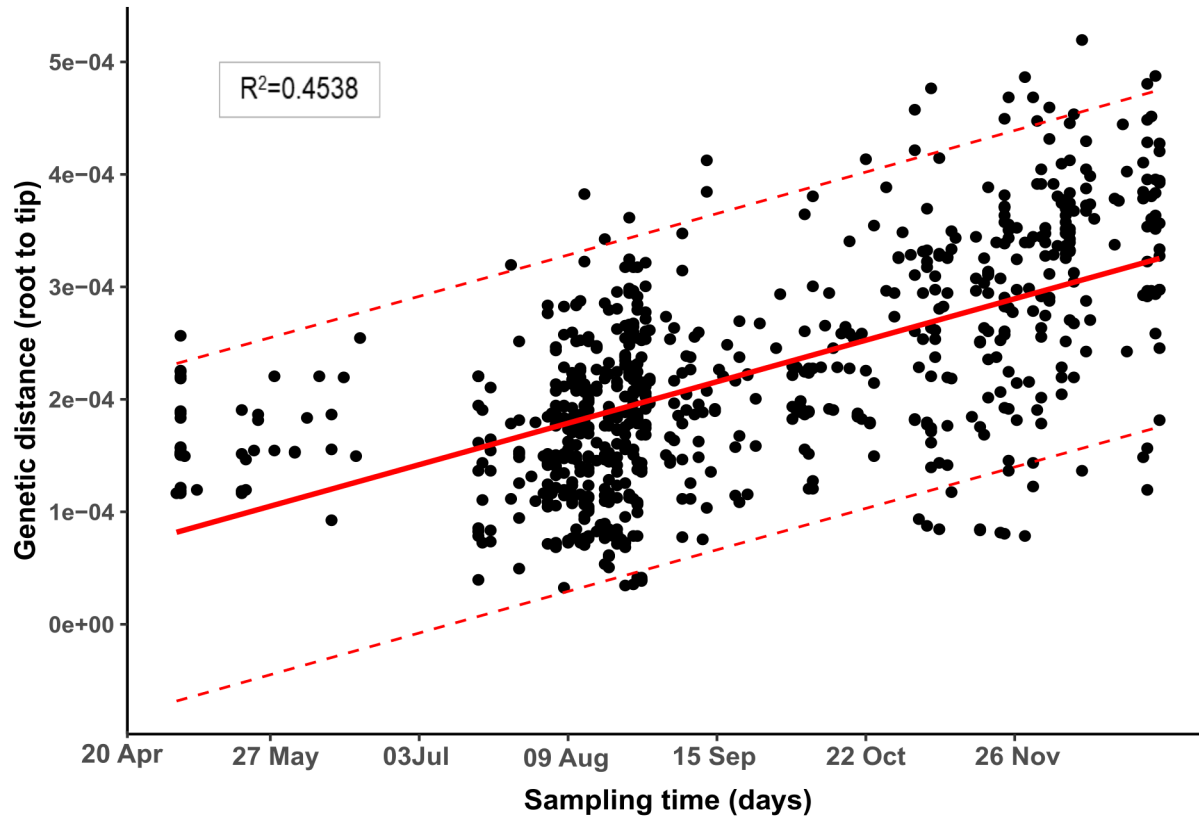

**Appendix Figure 5.** Root to tip regression of AY.57 coding sequences using for the evolution analysis. The solid line indicates the regression line; the dotted lines represent upper and lower limits of 95% confidence interval. Outliers were excluded from subsequence spatiotemporal evolutionary analysis. TempEst analysis indicated a positive correlation between genetic divergence and sampling time; the retrieved  $R^2$  value of 0.4538 ( $F = 438.4117$ ,  $p$  value  $<0.001$ ), suggesting a moderate temporal signal in the included sequences (<https://doi.org/10.1093/molbev/msr121>).
